# Supplementary material for: Structure–activity relationship of CuO–CeO2 in the synthesis of methyl N-phenylcarbamate
Source: Royal Society of Chemistry journal article supplement (doi:10.1039/d4nj05037a), 2025-01-01
Supplement: d4nj05037a1.pdf [file d4nj05037a1.pdf]

## Supporting Information

### **Structure–activity Relationship of the CuO–CeO<sub>2</sub> in the Synthesis of Methyl N-Phenylcarbamate**

Lu Ji <sup>a</sup>, Conghui Che <sup>a</sup>, Fang Li <sup>a, b, \*</sup>, Wei Xue <sup>a, b</sup>, Xiaoshu Ding <sup>a, c</sup>, Dongsheng  
Zhang <sup>a, c</sup>, Jing Li <sup>d, \*</sup>, Xinqiang Zhao <sup>a, b</sup>, Yanji Wang <sup>a, b, c, \*</sup>

<sup>a</sup> Hebei Provincial Key Laboratory of Green Chemical Technology and High Efficient  
Energy Saving, School of Chemical Engineering and Technology, Hebei University  
of Technology, Tianjin 300401, China

<sup>b</sup> Tianjin Key Laboratory of Chemical Process Safety, Tianjin 300130, China

<sup>c</sup> Hebei Industrial Technology Research Institute of Green Chemical Industry,  
Huanghua 061100, Hebei, China

<sup>d</sup> School of Civil Engineering, Hebei University of Technology, Tianjin 300401

## **S1. Experimental section**

### **1.1. Raw material**

aniline (98%, Macklin); dimethyl carbonate (98.0%, Macklin); nitrobenzene (98.0%, Sinopharm); Methyl *N*-Phenylcarbamate (98.0%, Macklin); *N*-methylaniline (98.0%, Macklin); *N,N'*-dimethylaniline (98.0%, Rhawn); diphenylurea (98.0%, Macklin). All reagents were used as received without further purification.

### **1.2. Analytical methods**

The internal standard method was used for the quantitative analysis of the products. The internal standard is nitrobenzene. Chromatographic conditions were as follows: Kromasil TM C18 (250 mm×4.6 mm, 5 μm) chromatographic column was used at the flow rate of 0.4 mL/min. The detection wavelength was 254 nm and CH<sub>3</sub>OH/H<sub>2</sub>O (60/40, V/V) was used as the mobile phase.

## S2. N<sub>2</sub> adsorption-desorption isotherms and pore size curves for diverse catalysts

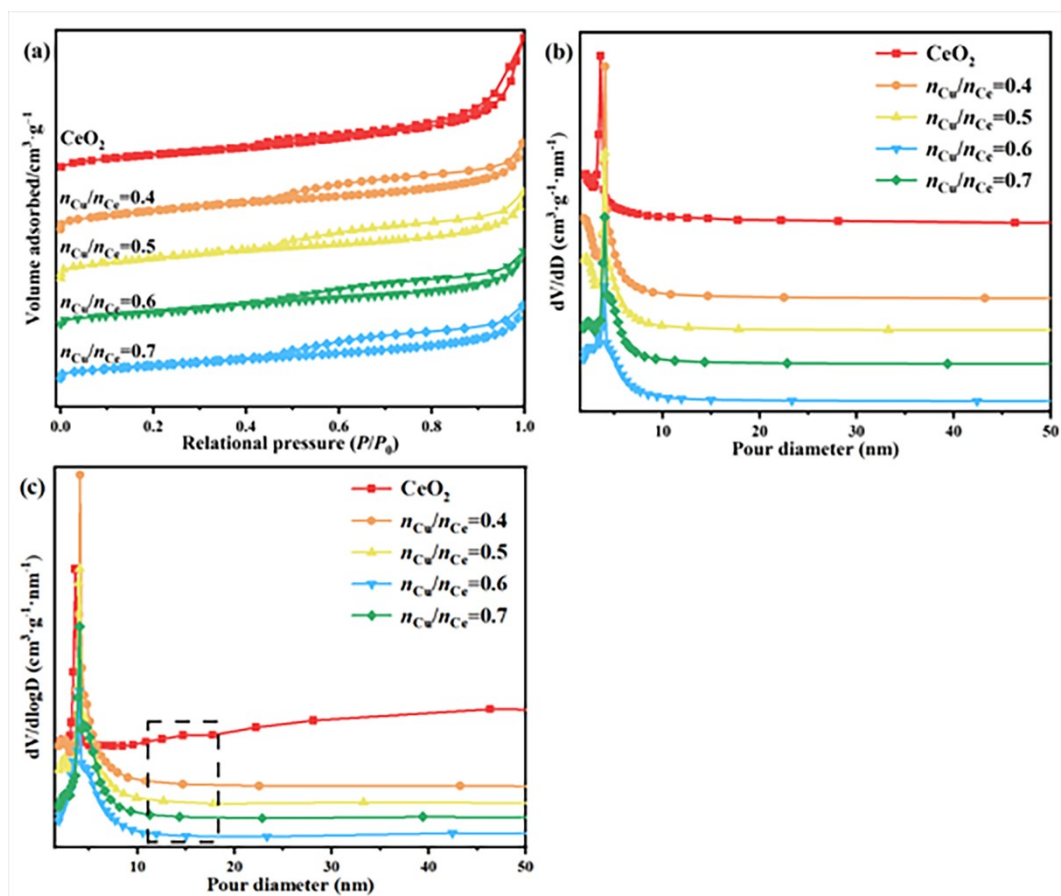

**Fig. S1.** N<sub>2</sub> adsorption-desorption isotherms (a) ; pore size curves (Y-axis:  $dV/dD$ ) (b) and pore size curves (Y-axis:  $dV/d\log D$ ) (c) for diverse catalysts

### S3. TEM images and particle size distribution

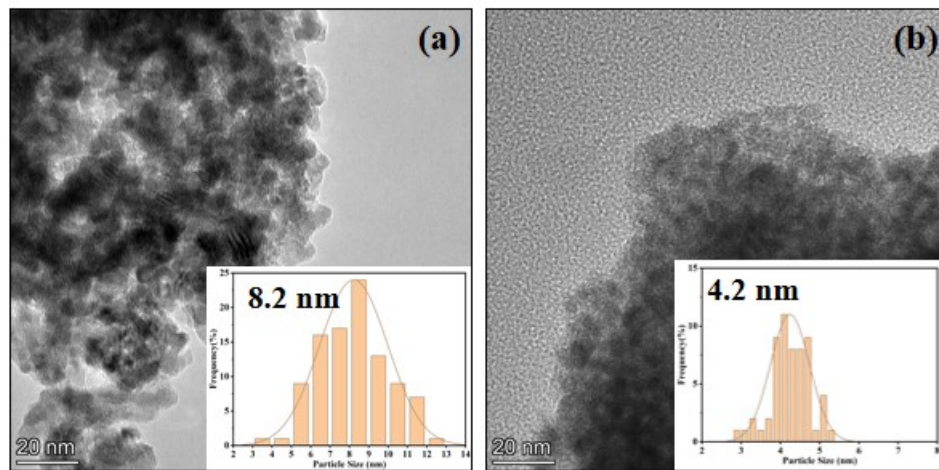

**Fig. S2.** TEM images and particle size distribution of  $\text{CeO}_2$  (a) and  $\text{CuO-CeO}_2$  ( $n_{\text{Cu}}/n_{\text{Ce}} = 0.6$ ) (b).

## S4. Raman

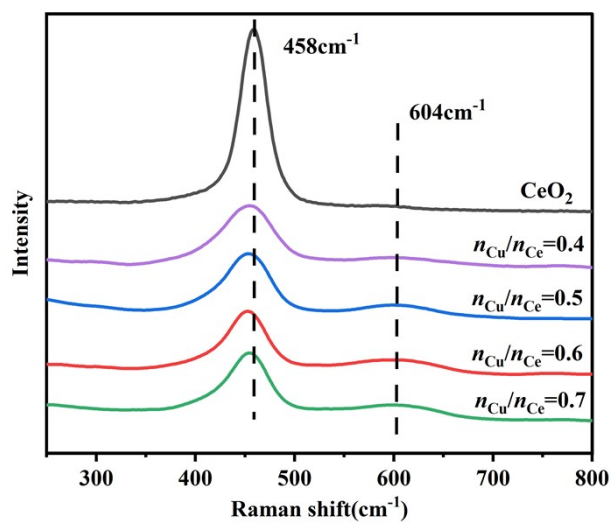

Fig. S3. Raman spectroscopy of different  $n_{\text{Cu}}/n_{\text{Ce}}$  catalysts

Table S1 Characterization result of different catalysts

| Catalyst                          | $I_{\text{D}}/I_{\text{F2g}}$ | $O_{\text{v}}/\%$ |
|-----------------------------------|-------------------------------|-------------------|
| $n_{\text{Cu}}/n_{\text{Ce}}=0.4$ | 0.087                         | 4.64              |
| $n_{\text{Cu}}/n_{\text{Ce}}=0.5$ | 0.206                         | 5.09              |
| $n_{\text{Cu}}/n_{\text{Ce}}=0.6$ | 0.274                         | 6.61              |
| $n_{\text{Cu}}/n_{\text{Ce}}=0.7$ | 0.228                         | 6.28              |
| $\text{CeO}_2$                    | 0.015                         | 4.42              |

## S5. Correlation of catalytic performance

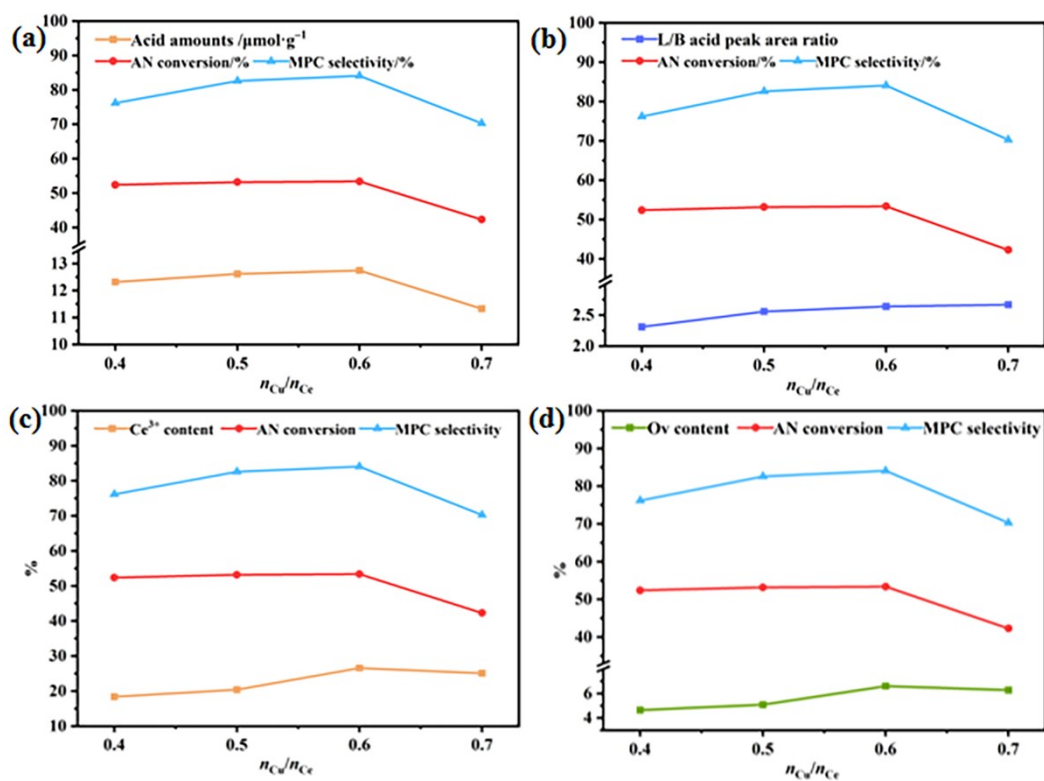

**Fig. S4.** The correlation between catalytic performance and the content of acid amounts (a), L/B acid peak area ratio (b), Ce<sup>3+</sup> (c) and oxygen vacancies (d) level in CuO-CeO<sub>2</sub> with different  $n_{Cu}/n_{Ce}$

## S6. *In situ* FT-IR

**Table S2** Absorption peaks and their corresponding functional groups in bare DMC and AN spectrum

| substance | wavenumber<br>cm <sup>-1</sup> | functional<br>group | vibrational mode             | References |
|-----------|--------------------------------|---------------------|------------------------------|------------|
| DMC       | 2965, 2865                     | -CH <sub>3</sub>    | C-H stretching vibration     | [1]        |
|           | 1460                           | -CH <sub>3</sub>    | C-H bending vibration        | [2]        |
|           | 1782, 1767                     | C=O                 | C=O stretching vibration     | [3]        |
|           | 1290                           | C-O-C               | O-C stretching vibration     | [3]        |
| AN        | 1602, 1499                     | benzene ring        | C=C stretching vibration     | [4]        |
|           | 3047                           | benzene ring        | =C-H stretching<br>vibration | [4]        |
|           | 1620                           | -NH <sub>2</sub>    | N-H bending vibration        | [5]        |
|           | 3413, 3358                     | -NH <sub>2</sub>    | N-H stretching vibration     | [5]        |

**Table S3** Absorption peaks and their corresponding functional groups of DMC and AN absorbed on CuO-CeO<sub>2</sub> surface

| substance | wavenumber<br>cm <sup>-1</sup> | functional<br>group | vibrational mode         | References |
|-----------|--------------------------------|---------------------|--------------------------|------------|
| DMC       | 3378                           | -OH                 | O-H stretching vibration | [3]        |
|           | 2910, 2811                     | -OCH <sub>3</sub>   | C-H stretching vibration | [6]        |
|           | 1099                           | -OCH <sub>3</sub>   | O-C stretching vibration | [7]        |
|           | 1036                           | -OCH <sub>3</sub>   | O-C stretching vibration | [7]        |
|           | 1770, 1735                     | C=O                 | C=O stretching vibration | [2]        |
|           | 1580                           | -COOCH <sub>3</sub> | C=O stretching vibration | [8]        |
| AN        | 3581                           | -OH                 | O-H stretching vibration | [3]        |
|           | 1605                           | -NH <sub>2</sub>    | N-H bending vibration    | [5]        |
|           | 3348, 3270                     | -NH <sub>2</sub>    | N-H stretching vibration | [5]        |

**S7. Catalytic performance of CuO–CeO<sub>2</sub> in MPC synthesis with error bars representing standard deviation (n=3)**

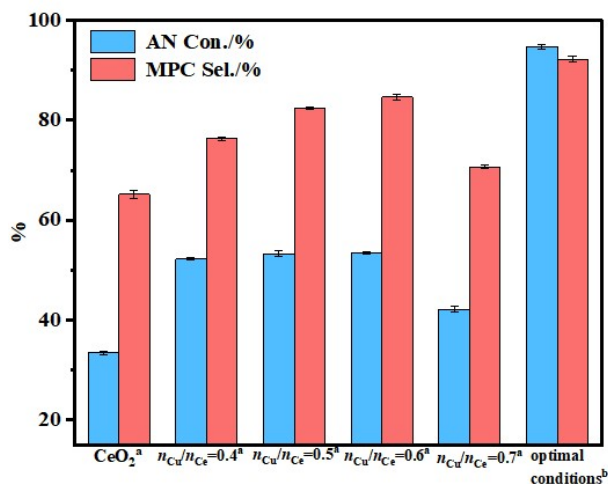

**Fig. S5.** Catalytic performances of diverse catalysts of MPC synthesis

<sup>a</sup>Reaction conditions:  $n_{\text{DMC}}/n_{\text{AN}} = 20$ ,  $m_{\text{catal.}}/m_{\text{AN}} = 0.25$ , 150 °C, 7 h

<sup>b</sup>Reaction conditions:  $n_{\text{DMC}}/n_{\text{AN}} = 10$ ,  $m_{\text{catal.}}/m_{\text{AN}} = 0.25$ , 170 °C, 9 h

**References:**

- [1] H.T. Varghese, C.Y. Panicker, D. Philip, J.R. Mannekutla, S.R. Inamdar, IR, Raman and SERS studies of methyl salicylate, *Spectrochim. Acta A*, 2007, 66, 959–963.
- [2] F. Li, Y. Jia, A.Z. Jia, L.Y. Gao, Y.J. Wang, Z.M. Wang, W. Xue, Fabrication and characterization of ZrO<sub>2</sub> and ZrO<sub>2</sub>/SiO<sub>2</sub> catalysts and their application in the synthesis of methyl N-phenyl carbamate: a study of the reaction mechanism by using in situ FT-IR spectroscopy, *Reaction Kinetics, Mech. Catal.*, 2021, 132, 893–906.
- [3] Q.Y. Deng, L. Liu, H.M. Deng, Course of Spectral Analysis (2nd Ed.), Beijing: Science Press, 2007.
- [4] J.Q. Fu, C.H. Ding, Study on alkylation of benzene with propylene over MCM-22 zeolite catalyst by in situ IR, *Catal. Commun.*, 2005, 6, 770–776.
- [5] C. Gee, S. Douin, C. Crepin, P. Brechignac, Infrared spectroscopy of aniline (C<sub>6</sub>H<sub>5</sub>NH<sub>2</sub>) and its cation in a cryogenic argon matrix, *Chem. Phys. Lett.*, 2001, 338, 130–136.



- [6] P. Burg, P. Fydrych, D. Cagniant, G. Nanse, J. Bime, A. Jankowska, The characterization of nitrogen-enriched activated carbons by IR, XPS and LSER methods, *Carbon*, 2002, 40.
- [7] C. Binet, M. Daturi, J.C. Lavalley, IR study of polycrystalline ceria properties in oxidised and reduced states, *Catal. Today*, 1999, 50, 207–225.
- [8] R. Juarez, P. Concepcion, A. Corma, V. Fornes, H.Garcia, Gold-catalyzed phosgene-free synthesis of polyurethane precursors, *Angew. Chem. Int. Ed.*, 2010, 49, 1286–1290.
